# Supplementary material
Source: PubMed Central journal article supplement (PMC2817812)

# **Pulmonary Hypertension and CT Measurement of Small Pulmonary Vessels in Severe Emphysema**

Shin Matsuoka, George R. Washko, Tsuneo Yamashiro, Raul San Jose Estepar, Alejandro Diaz, Edwin K. Silverman, Eric Hoffman, Henry E. Fessler, Gerard J. Criner, Nathaniel Marchetti, Steven M. Scharf, Fernando J. Martinez, John J. Reilly, Hiroto Hatabu and for the National Emphysema Treatment Trial Research Group

**ONLINE DATA SUPPLEMENT**

**Supplemental Online Figure E1**

The relationship between %CSA<5 and (A) FEV<sub>1</sub>%predicted, (B) DL<sub>CO</sub>% predicted, (C) PaO<sub>2</sub>, and (D) %LAA-950.

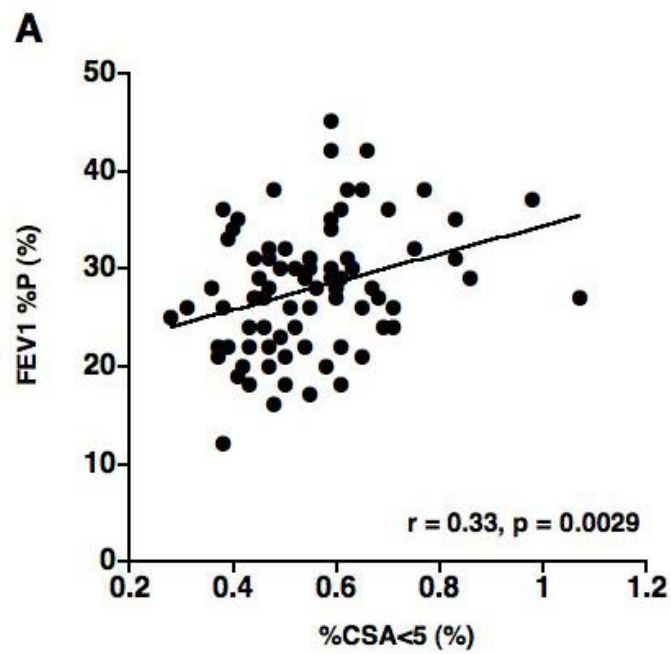

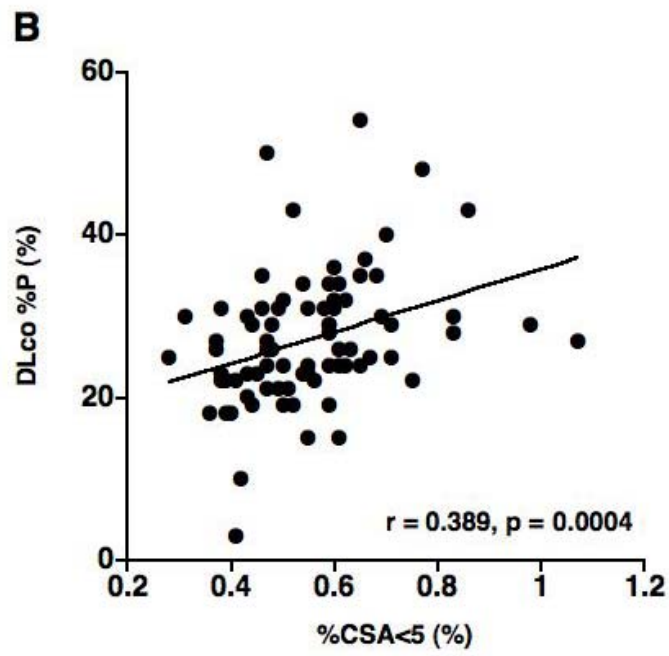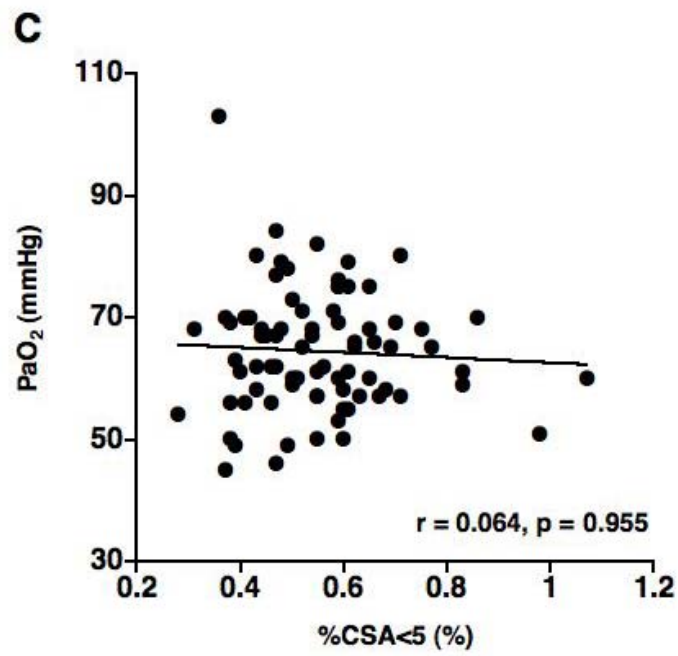

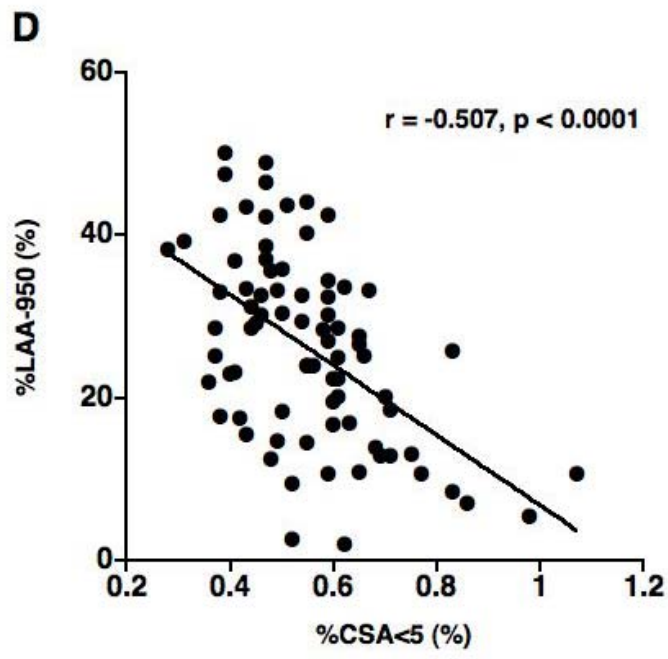

Supplement: supp_181_3_218__1.pdf [file supp_181_3_218__1.pdf]
